# Supplementary material for: From Coach Knowledge to Burnout: The Sequential Mediating Roles of Psychological Capital and Coach-Athlete Relationship Quality in Elite Football
Source: Research Square preprint supplement (doi:10.21203/rs.3.rs-8701114/v1), 2026-02-04
Supplement: Supplementary file 1 [file 93ee38efd738e7f4cc2a1b8d.pdf]

**Permission for Ce Guo to reproduce 1 copy  
within three years of October 24, 2025**

# **Psychological Capital Questionnaire**

## **Self & Rater Forms, Scoring Key**

### **Research Permission**

By Fred Luthans, Bruce J. Avolio & James B. Avey

Published by Mind Garden, Inc.  
[www.mindgarden.com](http://www.mindgarden.com)

### **Important Note**

It is your legal responsibility to adhere to the Research Permission terms of use which include but are not limited to the following:

You will only use this instrument for non-commercial unsupported research purposes. Your license to the content is personal to you and is solely for such non-commercial research purposes.

Reproduction includes all forms of physical or electronic administration including online survey, handheld survey devices, etc. The copyright holder has granted research permission to administer the specified number of copies of this document or instrument within three years from the date of purchase.

This instrument, and any use thereof, is covered by U.S. and international copyright laws. For any further use or reproduction of the instrument, in whole or in part, contact Mind Garden, Inc.

## Permission Letter

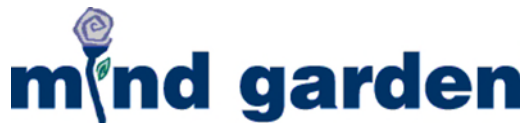

[www.mindgarden.com](http://www.mindgarden.com)

To Whom It May Concern,

The above-named person has made a license purchase from Mind Garden, Inc. and has permission to administer the following copyrighted instrument up to that quantity purchased:

### **Psychological Capital Questionnaire**

The license holder has permission to administer the complete instrument in their research, however, only three sample items from this instrument as specified below may be included in the research write-up, thesis, or dissertation. Any other use must receive prior written permission from Mind Garden. The entire instrument form may not be included or reproduced at any time in any other published material. Please understand that disclosing more than we have authorized will compromise the integrity and value of the test.

**Citation of the instrument must include the applicable copyright statement listed below.**

#### **Sample items:**

Self-Rater Form :

I feel confident analyzing a long-term problem to find a solution.

If I should find myself in a jam at work, I could think of many ways to get out of it.

When I have a setback at work, I have trouble recovering from it, moving on.

Other Rater Form:

This person feels confident analyzing a long-term problem to find a solution.

If this person should find him/herself in a jam at work, he/she could think of many ways to get out of it.

When this person has a setback at work, he/she has trouble recovering from it, moving on.

Copyright © 2007 Fred L. Luthans, Bruce J. Avolio, and James B. Avey. All rights reserved in all media. Published by Mind Garden, Inc., [www.mindgarden.com](http://www.mindgarden.com)

Sincerely,

Robert Most  
Mind Garden, Inc.  
[www.mindgarden.com](http://www.mindgarden.com)

## Conditions for Online Use

You agree to:

- Administer this Mind Garden instrument for research purposes only.
- Control access to the instrument. The instrument may not be made available via the open web, nor sent in the message body or as an attachment to survey participants.
- Avoid using copyrighted items from this instrument on the survey landing page. You should put other items on this landing page, e.g., demographics or informed consent.
- Put the instrument copyright statement on every page containing questions/items from this instrument. The copyright statement is provided in the enclosed permission letter.
- Track your license use. Each time a participant opens the survey and has access to the copyrighted items is considered one administration.
- Compensate Mind Garden, Inc. for each administration.
- Purchase a license for any additional administrations over the initial purchase quantity, or close the survey.
- Remove this online survey at the conclusion of your data collection and you will personally confirm that it cannot be accessed.

Caution: If you do not require a unique login for each respondent, the survey method you use may elicit a large number of responses to your survey. You are responsible for compensating Mind Garden for every administration, regardless of circumstances.

**Distributing an entire instrument in either the text of an email or as an email attachment is strictly prohibited.**

## **For Dissertation and Thesis Appendices**

This license permits you to administer the complete instrument in your research, however, only the three pre-authorized sample items from this instrument as provided by Mind Garden may be included in the research write-up, thesis, dissertation, or appendices, and only when accompanied by the instrument copyright statement. Detailed information on these requirements is provided in the enclosed permission letter.

## **For Results Reporting and Publications**

This research license is for data collection, and it permits you to collect and disclose item scores, scale scores, and scores statistics (group average, group standard deviation, T-scores, etc.). You may not include the complete instrument in results reporting or publications -- you may include only the three pre-authorized sample items and with copyright language and attribution: see the enclosed permission letter.

This license is for research only and not for providing individual feedback to survey participants. Please understand that disclosing more than we have authorized will compromise the integrity and value of the test.

Note: the list above illustrates some permitted and prohibited uses of the instrument and is not meant to be comprehensive.

## **Translations**

Translations are available free of charge with license purchase. Contact [info@mindgarden.com](mailto:info@mindgarden.com) to request translations. If you would like to make a translation, please complete the Translation Application, available at <https://www.mindgarden.com/mind-garden-forms/61-translation-application.html>

## **All Other Reproductions**

For any other reproductions or permissions, please contact [info@mindgarden.com](mailto:info@mindgarden.com)

## Psychological Capital Questionnaire (PCQ)

Fred L. Luthans, Ph.D., Bruce J. Avolio, Ph.D., & James A. Avey, Ph.D.

Psychological capital (PsyCap) is a positive state-like capacity that has undergone extensive theory-building and research. In the book by Luthans, Youssef, and Avolio on *Psychological Capital* (Oxford University Press, 2007), it is defined as “an individual’s positive psychological state of development and is characterized by: (1) having confidence (self efficacy) to take on and put in the necessary effort to succeed at challenging tasks; (2) making a positive attribution (optimism) about succeeding now and in the future; (3) persevering toward goals and, when necessary, redirecting paths to goals (hope) in order to succeed; and (4) when beset by problems and adversity, sustaining and bouncing back and even beyond (resilience) to attain success.” Thus, the PsyCap consists of **efficacy, optimism, hope and resilience** and when combined has been shown to represent a second-order, core factor that predicts performance and satisfaction better than each of the four factors that make it up ( Luthans, Avolio, et al.,2007).

Published research on PsyCap has found that it is related to multiple performance outcomes in the workplace, lower employee absenteeism, less employee cynicism and intentions to quit, and higher job satisfaction, commitment, and organizational citizenship behaviors. Research has also found PsyCap can be enhanced by a supportive work climate. In terms of being state-like, PsyCap has been developed by short training sessions in both classroom and field settings and electronically through the internet.

The PCQ-24, a measure of PsyCap, has undergone extensive psychometric analyses and support from samples representing service, manufacturing, education, high-tech, military and cross-cultural sectors. Each of the four components in PsyCap are measured by 6 items. The resulting score represents an individual’s level of positive PsyCap.

## References/Resources:

### Books:

Luthans, F., Avolio, B.J., & Youseff, C. (2007). *Psychological Capital: Developing the human capital edge*. Oxford, England: Oxford University Press.

Avolio, B.J., & Luthans, F. (2006). *High impact leader: Moments matter in authentic leadership development*. NY: McGraw-Hill.

### Articles:

Luthans, F., Avolio, B.J., Avey, J.B., & Norman, S.M. (2007). Positive psychological capital: Measurement and relationship with performance and satisfaction. *Personnel Psychology*, 60, 541-572.

Luthans, F., Norman, S.M., Avolio, B.J., & Avey, J.B. (2008). The mediating role of psychological capital in the supportive organizational climate: Employee performance relationship. *Journal of Organizational Behavior*, 29, 219-238.

Luthans, F., & Youssef, (2007). Emerging positive organizational behavior. *Journal of Management*, 33, 321-349.

Luthans, F., Avey, J.B., Avolio, B.J., Norman, S., Combs, G.M. (2006). Psychological capital development: A micro intervention. *Journal of Organizational Behavior*. 27, 387-393.

Luthans, F., Avey, J.B., Avolio, B.J., & Peterson, S.J. (2010). The development and resulting performance impact of positive psychological capital. *Human Resource Development Quarterly*, 21, 41-67.

Avey, J.B., Reichard, R.J., Luthans, F., & Mhatre, K.H. (2011). Meta-analysis of the impact of positive psychological capital on employee attitudes, behaviors, and performance. *Human Resource Development Quarterly*, 22, 127-152.

## Psychological Capital Questionnaire (PCQ) Self-Rater Version

Name: \_\_\_\_\_ Date: \_\_\_\_\_

Organization ID #: \_\_\_\_\_ Person ID #: \_\_\_\_\_

**Instructions:** Below are statements that describe how you may think about yourself **right now**. Use the following scale to indicate your level of agreement or disagreement with each statement.

| <b>Strongly<br/>Disagree</b> | <b>Disagree</b> | <b>Somewhat<br/>Disagree</b> | <b>Somewhat<br/>Agree</b> | <b>Agree</b> | <b>Strongly<br/>Agree</b> |
|------------------------------|-----------------|------------------------------|---------------------------|--------------|---------------------------|
| 1                            | 2               | 3                            | 4                         | 5            | 6                         |

|     |                                                                                                               |   |   |   |   |   |   |
|-----|---------------------------------------------------------------------------------------------------------------|---|---|---|---|---|---|
| 1.  | I feel confident analyzing a long-term problem to find a solution.                                            | 1 | 2 | 3 | 4 | 5 | 6 |
| 2.  | I feel confident in representing my work area in meetings with management.                                    | 1 | 2 | 3 | 4 | 5 | 6 |
| 3.  | I feel confident contributing to discussions about the organization's strategy.                               | 1 | 2 | 3 | 4 | 5 | 6 |
| 4.  | I feel confident helping to set targets/goals in my work area.                                                | 1 | 2 | 3 | 4 | 5 | 6 |
| 5.  | I feel confident contacting people outside the organization (e.g., suppliers, customers) to discuss problems. | 1 | 2 | 3 | 4 | 5 | 6 |
| 6.  | I feel confident presenting information to a group of colleagues.                                             | 1 | 2 | 3 | 4 | 5 | 6 |
| 7.  | If I should find myself in a jam at work, I could think of many ways to get out of it.                        | 1 | 2 | 3 | 4 | 5 | 6 |
| 8.  | At the present time, I am energetically pursuing my work goals.                                               | 1 | 2 | 3 | 4 | 5 | 6 |
| 9.  | There are lots of ways around any problem.                                                                    | 1 | 2 | 3 | 4 | 5 | 6 |
| 10. | Right now I see myself as being pretty successful at work.                                                    | 1 | 2 | 3 | 4 | 5 | 6 |
| 11. | I can think of many ways to reach my current work goals.                                                      | 1 | 2 | 3 | 4 | 5 | 6 |
| 12. | At this time, I am meeting the work goals that I have set for myself.                                         | 1 | 2 | 3 | 4 | 5 | 6 |
| 13. | When I have a setback at work, I have trouble recovering from it, moving on.                                  | 1 | 2 | 3 | 4 | 5 | 6 |
| 14. | I usually manage difficulties one way or another at work.                                                     | 1 | 2 | 3 | 4 | 5 | 6 |
| 15. | I can be "on my own," so to speak, at work if I have to.                                                      | 1 | 2 | 3 | 4 | 5 | 6 |
| 16. | I usually take stressful things at work in stride.                                                            | 1 | 2 | 3 | 4 | 5 | 6 |
| 17. | I can get through difficult times at work because I've experienced difficulty before.                         | 1 | 2 | 3 | 4 | 5 | 6 |

## Psychological Capital Questionnaire (PCQ) Self-Rater Version

| <b>Strongly<br/>Disagree</b> | <b>Disagree</b> | <b>Somewhat<br/>Disagree</b> | <b>Somewhat<br/>Agree</b> | <b>Agree</b> | <b>Strongly<br/>Agree</b> |
|------------------------------|-----------------|------------------------------|---------------------------|--------------|---------------------------|
| 1                            | 2               | 3                            | 4                         | 5            | 6                         |

|     |                                                                                   |   |   |   |   |   |   |
|-----|-----------------------------------------------------------------------------------|---|---|---|---|---|---|
| 18. | I feel I can handle many things at a time at this job.                            | 1 | 2 | 3 | 4 | 5 | 6 |
| 19. | When things are uncertain for me at work, I usually expect the best.              | 1 | 2 | 3 | 4 | 5 | 6 |
| 20. | If something can go wrong for me work-wise, it will.                              | 1 | 2 | 3 | 4 | 5 | 6 |
| 21. | I always look on the bright side of things regarding my job.                      | 1 | 2 | 3 | 4 | 5 | 6 |
| 22. | I'm optimistic about what will happen to me in the future as it pertains to work. | 1 | 2 | 3 | 4 | 5 | 6 |
| 23. | In this job, things never work out the way I want them to.                        | 1 | 2 | 3 | 4 | 5 | 6 |
| 24. | I approach this job as if "every cloud has a silver lining."                      | 1 | 2 | 3 | 4 | 5 | 6 |



## Psychological Capital Questionnaire (PCQ) Other Rater Version

Name of the Person or Position being Rated: \_\_\_\_\_

Date: \_\_\_\_\_

Organization ID #: \_\_\_\_\_ Person ID #: \_\_\_\_\_

**Instructions:** Below are statements that describe how you may think about the person listed above **right now**. Use the following scale to indicate your level of agreement or disagreement with each statement.

| Strongly<br>Disagree | Disagree | Somewhat<br>Disagree | Somewhat<br>Agree | Agree | Strongly<br>Agree |
|----------------------|----------|----------------------|-------------------|-------|-------------------|
| 1                    | 2        | 3                    | 4                 | 5     | 6                 |

|     |                                                                                                                          |   |   |   |   |   |   |
|-----|--------------------------------------------------------------------------------------------------------------------------|---|---|---|---|---|---|
| 1.  | This person feels confident analyzing a long-term problem to find a solution.                                            | 1 | 2 | 3 | 4 | 5 | 6 |
| 2.  | This person feels confident in representing his/her work area in meetings with management.                               | 1 | 2 | 3 | 4 | 5 | 6 |
| 3.  | This person feels confident contributing to discussions about the organization's strategy.                               | 1 | 2 | 3 | 4 | 5 | 6 |
| 4.  | This person feels confident helping to set targets/goals in his/her work area.                                           | 1 | 2 | 3 | 4 | 5 | 6 |
| 5.  | This person feels confident contacting people outside the organization (e.g., suppliers, customers) to discuss problems. | 1 | 2 | 3 | 4 | 5 | 6 |
| 6.  | This person feels confident presenting information to a group of colleagues.                                             | 1 | 2 | 3 | 4 | 5 | 6 |
| 7.  | If this person should find him/herself in a jam at work, he/she could think of many ways to get out of it.               | 1 | 2 | 3 | 4 | 5 | 6 |
| 8.  | At the present time, this person is energetically pursuing his/her work goals.                                           | 1 | 2 | 3 | 4 | 5 | 6 |
| 9.  | This person feels there are lots of ways around any problem.                                                             | 1 | 2 | 3 | 4 | 5 | 6 |
| 10. | Right now this person sees him/herself as being pretty successful at work.                                               | 1 | 2 | 3 | 4 | 5 | 6 |
| 11. | This person can think of many ways to reach his/her current work goals.                                                  | 1 | 2 | 3 | 4 | 5 | 6 |
| 12. | At this time, this person is meeting the work goals that he/she has set for him/herself.                                 | 1 | 2 | 3 | 4 | 5 | 6 |
| 13. | When this person has a setback at work, he/she has trouble recovering from it, moving on.                                | 1 | 2 | 3 | 4 | 5 | 6 |
| 14. | This person usually manages difficulties one way or another at work.                                                     | 1 | 2 | 3 | 4 | 5 | 6 |

## Psychological Capital Questionnaire (PCQ)

### Other Rater Version

| Strongly<br>Disagree | Disagree | Somewhat<br>Disagree | Somewhat<br>Agree | Agree | Strongly<br>Agree |
|----------------------|----------|----------------------|-------------------|-------|-------------------|
| 1                    | 2        | 3                    | 4                 | 5     | 6                 |

|     |                                                                                                       |   |   |   |   |   |   |
|-----|-------------------------------------------------------------------------------------------------------|---|---|---|---|---|---|
| 15. | This person can be “on his/her own,” so to speak, at work if he/she has to.                           | 1 | 2 | 3 | 4 | 5 | 6 |
| 16. | This person usually takes stressful things at work in stride.                                         | 1 | 2 | 3 | 4 | 5 | 6 |
| 17. | This person can get through difficult times at work because he/she has experienced difficulty before. | 1 | 2 | 3 | 4 | 5 | 6 |
| 18. | This person feels he/she can handle many things at a time at this job.                                | 1 | 2 | 3 | 4 | 5 | 6 |
| 19. | When things are uncertain for this person at work, he/she usually expects the best.                   | 1 | 2 | 3 | 4 | 5 | 6 |
| 20. | This person feels if something can go wrong for him/her work-wise, it will.                           | 1 | 2 | 3 | 4 | 5 | 6 |
| 21. | This person always looks on the bright side of things regarding his/her job.                          | 1 | 2 | 3 | 4 | 5 | 6 |
| 22. | This person is optimistic about what will happen to him/her in the future as it pertains to work.     | 1 | 2 | 3 | 4 | 5 | 6 |
| 23. | This person feels in this job, things never work out the way he/she wants them to.                    | 1 | 2 | 3 | 4 | 5 | 6 |
| 24. | This person approaches this job as if “every cloud has a silver lining.”                              | 1 | 2 | 3 | 4 | 5 | 6 |

## Psychological Capital Questionnaire (PCQ) Scoring Key

### Psychological Capital (PsyCap) Questionnaire (PCQ) Scales:

Scoring for PsyCap is just total points but it should be carefully noted that items 13, 20, and 23 are **Reverse** scored (i.e., for these items a “1” is scored as a “6” and a “6” is scored as a “1”; a 2 is a 5 and a 5 is a 2; and a 3 is a 4 and a 4 is a 3).

**Efficacy:** items 1-6, scale adapted from Parker, 1998

**Hope:** items 7-12, adapted from Snyder et al., 1996

**Resilience:** items 13-18, (13 is reverse scored), adapted from Wagnild and Young, 1993

**Optimism:** items 19-24 (20 and 23 are reverse scored), adapted from Scheier and Carver, 1985

## Psychological Capital Questionnaire (PCQ-12) Self-Rater Short Form

Name: \_\_\_\_\_ Date: \_\_\_\_\_

**Instructions:** Below are statements that describe how you may think about yourself **right now**. Use the following scale to indicate your level of agreement or disagreement with each statement.

| <b>Strongly<br/>Disagree</b> | <b>Disagree</b> | <b>Somewhat<br/>Disagree</b> | <b>Somewhat<br/>Agree</b> | <b>Agree</b> | <b>Strongly<br/>Agree</b> |
|------------------------------|-----------------|------------------------------|---------------------------|--------------|---------------------------|
| 1                            | 2               | 3                            | 4                         | 5            | 6                         |

- |                                                                                           |   |   |   |   |   |   |
|-------------------------------------------------------------------------------------------|---|---|---|---|---|---|
| 1. I feel confident in representing my work area in meetings with management.             | 1 | 2 | 3 | 4 | 5 | 6 |
| 2. I feel confident contributing to discussions about the organization's strategy.        | 1 | 2 | 3 | 4 | 5 | 6 |
| 3. I feel confident presenting information to a group of colleagues.                      | 1 | 2 | 3 | 4 | 5 | 6 |
| 4. If I should find myself in a jam at work, I could think of many ways to get out of it. | 1 | 2 | 3 | 4 | 5 | 6 |
| 5. Right now I see myself as being pretty successful at work.                             | 1 | 2 | 3 | 4 | 5 | 6 |
| 6. I can think of many ways to reach my current work goals.                               | 1 | 2 | 3 | 4 | 5 | 6 |
| 7. At this time, I am meeting the work goals that I have set for myself.                  | 1 | 2 | 3 | 4 | 5 | 6 |
| 8. I can be "on my own," so to speak, at work if I have to.                               | 1 | 2 | 3 | 4 | 5 | 6 |
| 9. I usually take stressful things at work in stride.                                     | 1 | 2 | 3 | 4 | 5 | 6 |
| 10. I can get through difficult times at work because I've experienced difficulty before. | 1 | 2 | 3 | 4 | 5 | 6 |
| 11. I always look on the bright side of things regarding my job.                          | 1 | 2 | 3 | 4 | 5 | 6 |
| 12. I'm optimistic about what will happen to me in the future as it pertains to work.     | 1 | 2 | 3 | 4 | 5 | 6 |

## **Psychological Capital Questionnaire (PCQ-12) Self-Rater Short Form Scoring Key**

### **Psychological Capital (PsyCap) Questionnaire (PCQ) Scales:**

Each of the four PCQ subscale scores is calculated by taking the mean (average) of all items in the scale. The overall PsyCap score is calculated by taking the mean of all items in the PCQ.

**Efficacy:** items 1-3

**Hope:** items 4-7

**Resilience:** items 8-10

**Optimism:** items 11-12
